# Supplementary material for: Individuals with problem gambling and obsessive-compulsive disorder learn through distinct reinforcement mechanisms
Source: PubMed Central journal article supplement (PMC10013903; doi:10.1371/journal.pbio.3002031), 2023-03-14
Supplement: pbio.3002031.s002.pdf [file pbio.3002031.s002.pdf]

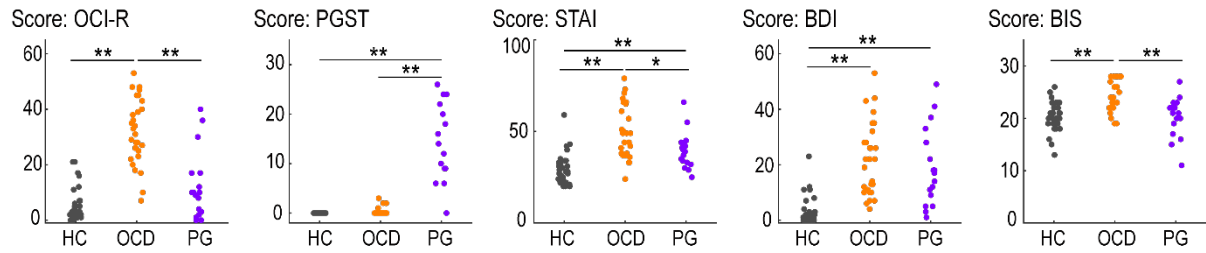

**S1 Fig. Questionnaire-based psychiatric symptoms.**

Obsessive-Compulsive Inventory-Revised (OCI-R), Problem Gambling Severity Index (PGSI), Barratt Impulsiveness Scale (BIS), Beck Depression Inventory (BDI), and the State and Trait Anxiety Inventory (STAI). \*\* $P < 0.01$  and \* $P < 0.05$ , two-tailed Welch's  $t$ -test, Bonferroni-corrected for the three tests performed.

Summary data to reproduce the figure are available at <https://osf.io/v7em5/>.
