# Supplementary material for: Individuals with problem gambling and obsessive-compulsive disorder learn through distinct reinforcement mechanisms
Source: PubMed Central journal article supplement (PMC10013903; doi:10.1371/journal.pbio.3002031), 2023-03-14
Supplement: pbio.3002031.s003.pdf [file pbio.3002031.s003.pdf]

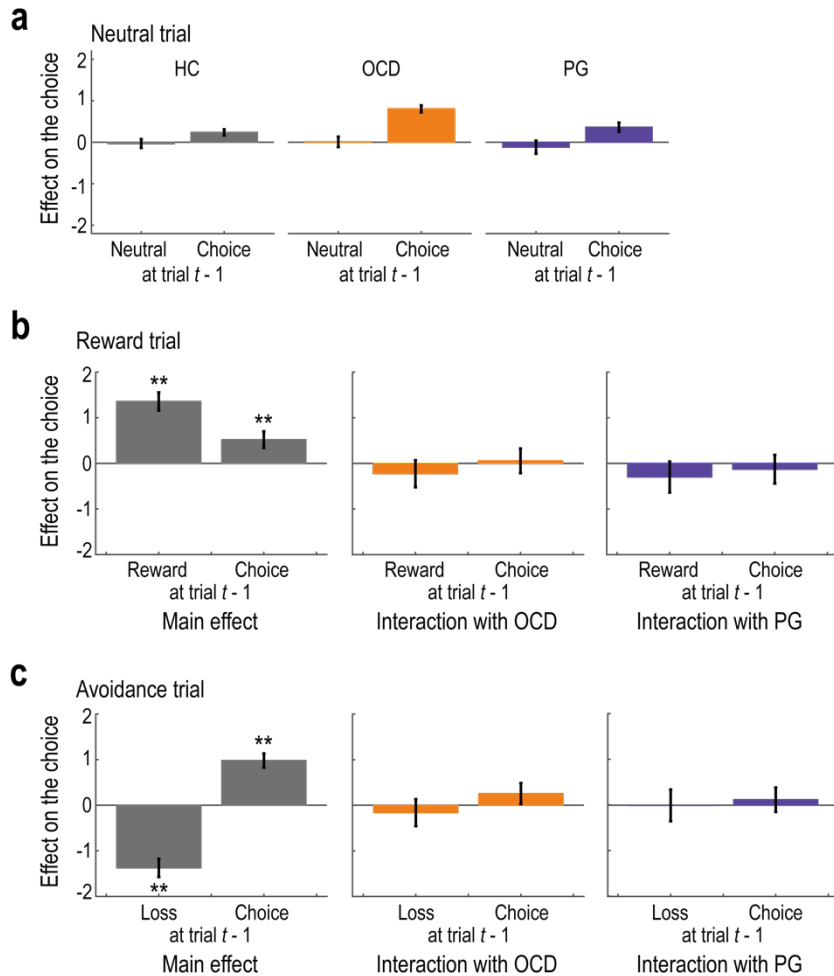

**S2 Fig. Supplementary regression analysis on the behaviour.**

- (a) Effects of past neutral outcomes and past choices on current behaviour in neutral trials (mean  $\pm$  SEM). The format is the same as in Fig 2.
- (b) Effects of past rewards and past choices on current behaviour in reward trials (mean  $\pm$  SEM). The mean and SEM of the effects were estimated with generalized linear mixed-effect models (GLMM2). \*\* $P < 0.01$ , two-tailed  $t$ -test, Bonferroni-corrected for the two tests performed in each model. *Grey*, the main effects over the three groups of participants (HC, OCD and PG). *Orange*, the interaction effects with the OCD dummy variable, indicating how the effects of the past reward and choice were modulated by OCD (compared with HC). *Purple*, the interaction effects with the PG dummy variable, indicating how the effects of the past reward and choice were modulated by PG (compared with HC).
- (c) Effects of past losses and past choices on current behaviour in avoidance trials (mean  $\pm$  SEM). The format is the same as in (b).

Summary data to reproduce the figure are available at <https://osf.io/v7em5/>.
