# Supplementary material for: Individuals with problem gambling and obsessive-compulsive disorder learn through distinct reinforcement mechanisms
Source: PubMed Central journal article supplement (PMC10013903; doi:10.1371/journal.pbio.3002031), 2023-03-14
Supplement: pbio.3002031.s007.pdf [file pbio.3002031.s007.pdf]

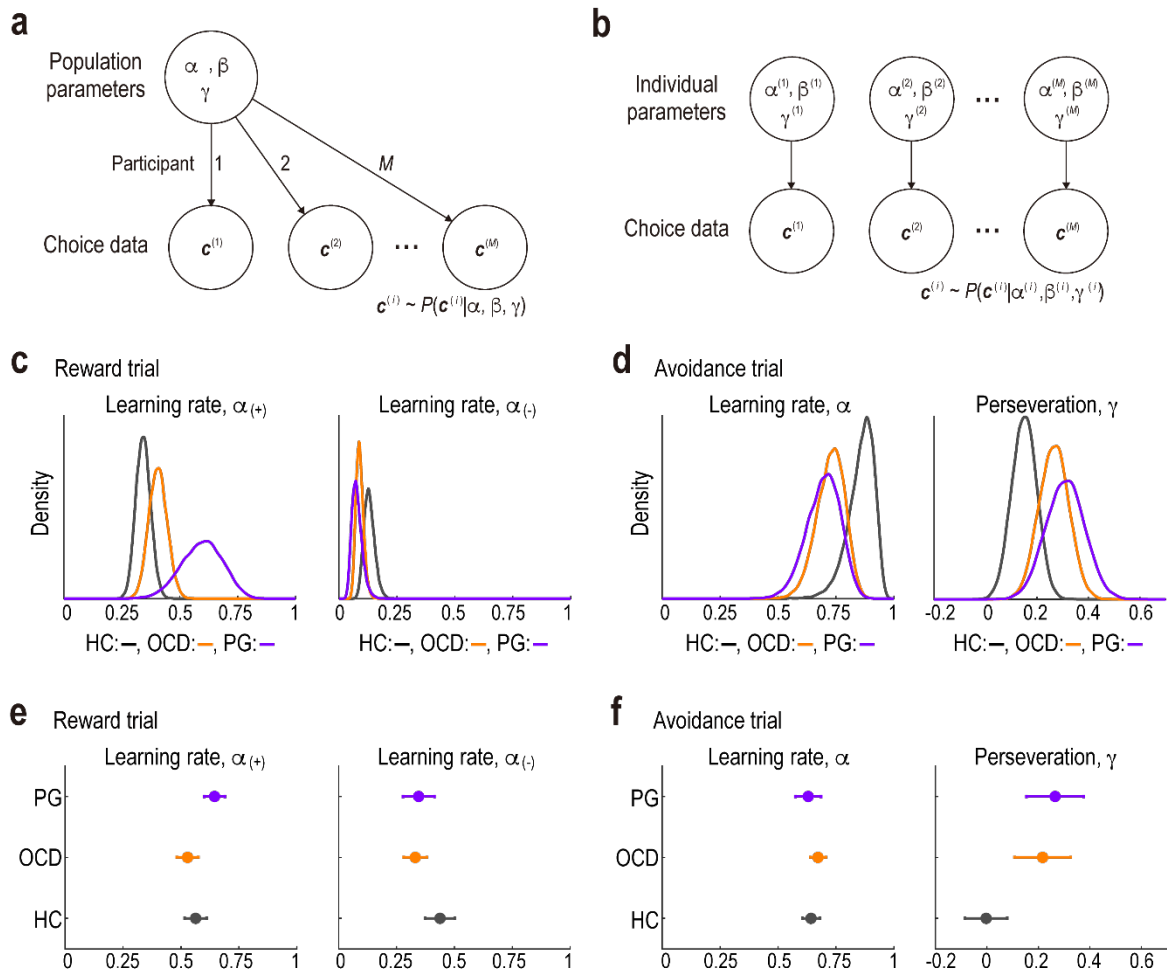

**S6 Fig. Supplementary analysis of the parameter estimation.**

- (a) Graphical illustration of the *group* model-fitting approach that pools the data from all participants together. For each group (HC, OCD and PG), participants are assumed to share the same set of parameters (e.g.,  $\alpha, \beta$  and  $\gamma$  in RL3).  $M$ , the number of participants.  $\mathbf{c}^{(i)}$ , participant  $i$ 's choice data.
- (b) Graphical illustration of the *individual* model-fitting approach that assumes each participant has an independent set of parameters (e.g.,  $\alpha^{(i)}, \beta^{(i)}$  and  $\gamma^{(i)}$  in RL3). The model is fitted to each participant's data separately.
- (c) Results of the *group* model-fitting approach in reward trials: posterior distributions of parameters of RL2 for each group. *Left*, learning rate from the positive reward prediction error,  $\alpha_{(+)}$  (HC: mode = 0.34 and 95% HDI = [0.28, 0.41]; OCD: mode = 0.41 and 95% HDI = [0.33, 0.48]; and PG: mode = 0.62 and 95% HDI = [0.42, 0.76]). *Right*, learning rate from the negative reward prediction error,  $\alpha_{(-)}$  (HC: mode = 0.13 and 95% HDI = [0.09, 0.17]; OCD: mode = 0.09 and 95% HDI = [0.06, 0.12]; and PG: mode = 0.07 and 95% HDI = [0.04, 0.12]). *Grey*, healthy control (HC); *orange*, obsessive-compulsive disorder (OCD); *purple*, pathological gambling (PG).
- (d) Results of the *group* model-fitting approach in avoidance trials: posterior distributions of

parameters of RL3 for each group. *Left*: learning rate,  $\alpha$  (HC: mode = 0.88 and 95% HDI = [0.75, 0.95]; OCD: mode = 0.75 and 95% HDI = [0.61, 0.84]; and PG: mode = 0.72 and 95% HDI = [0.55, 0.83]); *right*: perseveration,  $\gamma$  (HC: mode = 0.16 and 95% HDI = [0.06, 0.24]; OCD: mode = 0.28 and 95% HDI = [0.15, 0.38]; and PG: mode = 0.32 and 95% HDI = [0.16, 0.45]). The format is the same as in (c).

- (e) Results of the *individual* model-fitting approach in reward trials: MEAN and SEM of the individual participants' parameter estimates. *Left*, learning rate from the positive reward prediction error,  $\alpha_{(+)}$  (HC: MEAN  $\pm$  SEM = 0.56  $\pm$  0.05; OCD: 0.53  $\pm$  0.05; and PG: 0.65  $\pm$  0.04). *Right*, learning rate from the negative reward prediction error,  $\alpha_{(-)}$  (HC: 0.44  $\pm$  0.06; OCD: 0.33  $\pm$  0.05; and PG: 0.35  $\pm$  0.07). *Grey*, healthy control (HC); *orange*, obsessive-compulsive disorder (OCD); *purple*, pathological gambling (PG).
- (f) Results of the *individual* model-fitting approach in avoidance trials: MEAN and SEM of the individual participants' parameter estimates. *Left*: learning rate,  $\alpha$  (HC: 0.64  $\pm$  0.04; OCD: 0.67  $\pm$  0.03; and PG: 0.63  $\pm$  0.06); *right*: perseveration,  $\gamma$  (HC: 0.00  $\pm$  0.08; OCD: 0.22  $\pm$  0.11; and PG: 0.26  $\pm$  0.11). The format is the same as in (e).

Summary data to reproduce the figure are available at <https://osf.io/v7em5/>.
