# Supplementary material for: Individuals with problem gambling and obsessive-compulsive disorder learn through distinct reinforcement mechanisms
Source: PubMed Central journal article supplement (PMC10013903; doi:10.1371/journal.pbio.3002031), 2023-03-14
Supplement: pbio.3002031.s010.pdf [file pbio.3002031.s010.pdf]

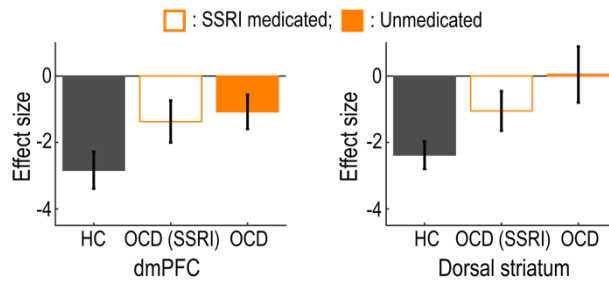

**S9 Fig. Comparisons between SSRI-medicated and unmedicated OCD patients.**

Effect sizes of the negative reward prediction error in reward trials for the HC, SSRI-medicated OCD, and unmedicated OCD groups (mean  $\pm$  SEM). *Left*, dorsomedial prefrontal cortex (dmPFC); and *right*, dorsal striatum. *Grey bars*, HC; *open bars*, SSRI-medicated OCD; and *orange bars*, unmedicated OCD. HC, healthy control; OCD, obsessive-compulsive disorder; SSRI, selective serotonin reuptake inhibitors.

Summary data to reproduce the figure are available at <https://osf.io/v7em5/>.
