# Supplementary material for: Individuals with problem gambling and obsessive-compulsive disorder learn through distinct reinforcement mechanisms
Source: PubMed Central journal article supplement (PMC10013903; doi:10.1371/journal.pbio.3002031), 2023-03-14
Supplement: pbio.3002031.s012.pdf [file pbio.3002031.s012.pdf]

**S1 Table. Demographic characteristics of the participants**

|                                                      | HC ( <i>N</i> = 34) | OCD ( <i>N</i> = 29) | PG ( <i>N</i> = 17)     |
|------------------------------------------------------|---------------------|----------------------|-------------------------|
| Age (mean ± SD)                                      | 34.6 ± 9.8 yrs      | 32.3 ± 10.1 yrs      | 33.6 ± 12.9 yrs         |
| Sex (% females)                                      | 56%                 | 55%                  | 41%                     |
| % Right-handers                                      | 97%                 | 100%                 | 100%                    |
| IQ (mean ± SD)                                       | 114.6 ± 13.1        | 115.9 ± 10.0         | 113.1 ± 12.3            |
| Illness duration (mean ± SD)                         | N/A                 | 13.9 ± 8.99 yrs      | 9.43 ± 6.72 yrs         |
| Monthly monetary losses<br>from gambling (mean ± SD) | 6.8 ± 22.5<br>AU\$  | 10.1 ± 27.4<br>AU\$  | 1318.8 ± 1735.0<br>AU\$ |
| SSRI Medication (%)                                  | 0%                  | 48%                  | 12%                     |

HC, healthy control; OCD, obsessive-compulsive disorder; PG, pathological gambling; IQ, intelligence quotient (missing in one HC and one OCD participant); and SSRI, selective serotonin reuptake inhibitor.
