# Supplementary material for: Individuals with problem gambling and obsessive-compulsive disorder learn through distinct reinforcement mechanisms
Source: PubMed Central journal article supplement (PMC10013903; doi:10.1371/journal.pbio.3002031), 2023-03-14
Supplement: pbio.3002031.s014.pdf [file pbio.3002031.s014.pdf]

**S3 Table. Brain areas exhibiting significant changes in the BOLD signal associated with the positive reward prediction error in reward trials.**

| Correlation | Region                                                            | Hemi | x   | y   | z   | t-statistic | p-value | Voxels |
|-------------|-------------------------------------------------------------------|------|-----|-----|-----|-------------|---------|--------|
| Positive    | <b>Insula</b>                                                     | R    | 30  | 20  | -13 | 7.02        | 0.000   | 1618   |
|             | <b>Ventral striatum</b> (ventral part of the caudate and putamen) | R    | 12  | 8   | 2   | 6.80        | 0.000   | -      |
|             | <b>Insula</b>                                                     | L    | -30 | 20  | -10 | 6.30        | 0.000   | -      |
|             | <b>mPFC</b> (BA 8/32)                                             | R    | 3   | 41  | 29  | 6.86        | 0.000   | 749    |
|             | <b>mPFC</b> (BA 32)                                               |      | 6   | 41  | 11  | 5.57        |         |        |
|             | <b>mPFC</b> (BA 10)                                               |      | 0   | 62  | 17  | 4.92        |         |        |
|             | Inferior parietal lobule (BA 7/40)                                | L    | -48 | -61 | 44  | 6.06        | 0.000   | 385    |
|             | Inferior parietal lobule (BA 7/40)                                | R    | 33  | -79 | 11  | 5.87        | 0.000   | 569    |
|             | Middle occipital gyrus (BA 19)                                    | L    | -30 | -88 | 20  | 5.84        | 0.000   | 69     |
|             | Middle temporal gyrus (BA 21)                                     | R    | 66  | -31 | -4  | 5.02        | 0.000   | 92     |
|             | Posterior cingulate cortex (BA 23)                                | L/R  | 0   | -28 | 35  | 4.94        | 0.000   | 153    |
|             | Lateral prefrontal cortex (BA 8/9)                                | R    | 42  | 20  | 53  | 4.78        | 0.000   | 80     |
|             | Precentral gyrus (BA 6/9)                                         | L    | -51 | 2   | 47  | 4.71        | 0.000   | 110    |
|             | Precuneus (BA 7)                                                  | R    | 9   | -67 | 41  | 4.40        | 0.000   | 60     |
| Negative    | Paracentral lobule (BA 5)                                         | R    | 9   | -37 | 56  | 4.36        | 0.000   | 82     |

Activated clusters observed in the whole-brain analysis ( $P < 0.05$  cluster-level corrected) of fMRI. The regions of interest discussed in the main text are shown in bold. mPFC: medial prefrontal cortex; BA, Brodmann area.
