# Supplementary material for: Individuals with problem gambling and obsessive-compulsive disorder learn through distinct reinforcement mechanisms
Source: PubMed Central journal article supplement (PMC10013903; doi:10.1371/journal.pbio.3002031), 2023-03-14
Supplement: pbio.3002031.s015.pdf [file pbio.3002031.s015.pdf]

**S4 Table. Brain areas exhibiting significant changes in the BOLD signal associated with the negative reward prediction error in reward trials.**

| Correlation | Region                               | Hemi | x   | y   | z   | t-statistic | p-value | Voxels |
|-------------|--------------------------------------|------|-----|-----|-----|-------------|---------|--------|
| Positive    | Posterior cingulate cortex (BA 31)   | L    | -12 | -55 | 17  | 6.91        | 0.000   | 937    |
|             | <b>vmPFC</b> (BA 32/10)              | L    | -3  | 47  | -4  | 6.82        | 0.000   | 784    |
|             | <b>vmPFC</b> (BA 32)                 | L/R  | 0   | 35  | -10 | 6.25        | 0.000   | -      |
|             | <b>vmPFC</b> (BA 32)                 | L    | -9  | 29  | -4  | 6.00        | 0.000   | -      |
|             | Middle occipital gyrus (BA 19/39)    | L    | -36 | -76 | 38  | 5.68        | 0.000   | 89     |
|             | Hippocampus                          | R    | 21  | -10 | -16 | 5.43        | 0.000   | 75     |
|             | Hippocampus                          | L    | -24 | -22 | -19 | 5.41        | 0.000   | 86     |
|             | Lateral prefrontal cortex (BA 8)     | L    | -21 | 38  | 50  | 4.78        | 0.000   | 52     |
|             | Lateral orbitofrontal cortex (BA 47) | L    | -33 | 35  | -13 | 4.78        | 0.000   | 35     |
|             | Operculum                            | R    | 36  | -16 | 23  | 4.51        | 0.000   | 48     |
| Negative    | <b>dmPFC</b> (BA 8)                  | R    | 3   | 23  | 47  | 6.58        | 0.000   | 319    |
|             | <b>dmPFC</b> (BA 8)                  | R    | 3   | 35  | 44  | 6.32        | 0.000   | -      |
|             | Lateral prefrontal cortex (BA 9/8/6) | R    | 45  | 14  | 41  | 6.39        | 0.000   | 1339   |
|             | <b>Insula</b>                        | R    | 36  | 20  | -1  | 6.34        | 0.000   | -      |
|             | Lateral prefrontal cortex (BA 9)     | R    | 51  | 26  | 32  | 6.31        | 0.000   | -      |
|             | Inferior parietal lobule (BA 40)     | R    | 51  | -40 | 53  | 6.21        | 0.000   | 538    |
|             | <b>Insula</b>                        | L    | -30 | 20  | 2   | 5.21        | 0.000   | 144    |
|             | Inferior parietal lobule (BA 40)     | L    | -33 | -55 | 50  | 5.00        | 0.000   | 239    |
|             | Lateral prefrontal cortex (BA 9/8/6) | L    | -48 | 20  | 41  | 4.80        | 0.000   | 165    |
|             | <b>Striatum (caudate)</b>            | R    | 12  | 5   | 11  | 4.62        | 0.000   | 79     |

Activated clusters observed in the whole-brain analysis ( $P < 0.05$  cluster-level corrected) of fMRI. The regions of interest discussed in the main text are shown in bold. vmPFC: ventromedial prefrontal cortex; dmPFC: dorsomedial prefrontal cortex; BA, Brodmann area.
