# Supplementary material for: Individuals with problem gambling and obsessive-compulsive disorder learn through distinct reinforcement mechanisms
Source: PubMed Central journal article supplement (PMC10013903; doi:10.1371/journal.pbio.3002031), 2023-03-14
Supplement: pbio.3002031.s016.pdf [file pbio.3002031.s016.pdf]

**S5 Table. Brain areas exhibiting significant changes in the BOLD signal associated with the unitary reward prediction error in avoidance trials.**

| Correlation | Region                               | Hemi | x   | y   | z   | t-statistic | p-value | Voxels |
|-------------|--------------------------------------|------|-----|-----|-----|-------------|---------|--------|
| Positive    | Lateral prefrontal cortex (BA 8/9)   | R    | 21  | 56  | 8   | 6.40        | 0.000   | 1938   |
|             | Lateral prefrontal cortex (BA 46/10) | L    | -45 | 44  | 8   | 5.89        | 0.000   | 218    |
|             | Inferior parietal lobule (BA 40/7)   | L    | -33 | -55 | 41  | 5.73        | 0.000   | 1068   |
|             | Inferior parietal lobule (BA 7/40)   | R    | 33  | -55 | 41  | 5.51        | 0.000   | 1062   |
|             | Middle temporal gyrus (BA 37)        | L    | -42 | -49 | -10 | 5.05        | 0.000   | 68     |
|             | Inferior temporal gyrus (BA 37)      | R    | 33  | -67 | 2   | 4.98        | 0.000   | 176    |
|             | <b>Striatum (putamen)</b>            | R    | 30  | -13 | -1  | 4.56        | 0.000   | 75     |
|             | <b>Striatum (putamen)</b>            | L    | -27 | -10 | 2   | 4.25        | 0.000   | 52     |
| Negative    | <b>mPFC (BA 10/9)</b>                | L    | -6  | 53  | 23  | 4.98        | 0.000   | 150    |
|             | <b>mPFC (BA 10)</b>                  | L/R  | 0   | 56  | 17  | 4.73        | 0.000   | -      |
|             | <b>mPFC (BA 10)</b>                  | L    | -6  | 50  | 11  | 4.20        | 0.000   | -      |

Activated clusters observed in the whole-brain analysis ( $P < 0.05$  cluster-level corrected) of fMRI. The regions of interest discussed in the main text are shown in bold. mPFC: medial prefrontal cortex; BA, Brodmann area.
