# Supplementary material for: Individuals with problem gambling and obsessive-compulsive disorder learn through distinct reinforcement mechanisms
Source: PubMed Central journal article supplement (PMC10013903; doi:10.1371/journal.pbio.3002031), 2023-03-14
Supplement: pbio.3002031.s017.pdf [file pbio.3002031.s017.pdf]

**S6 Table. WAIC values in the supplementary model comparison.**

|                 | Group | Best-fitted RL | VKF    | PH     | RELATIVE |
|-----------------|-------|----------------|--------|--------|----------|
| Reward trial    | HC    | <b>1814.4</b>  | 2265.4 | 1880.9 | 1915.0   |
|                 | OCD   | <b>1474.9</b>  | 1733.4 | 1487.0 | 1485.0   |
|                 | PG    | <b>999.2</b>   | 1214.3 | 1018.6 | 1011.8   |
| Avoidance trial | HC    | <b>2373.0</b>  | 2382.9 | 2380.9 | 2385.6   |
|                 | OCD   | <b>1929.6</b>  | 1969.6 | 1964.2 | 1985.7   |
|                 | PG    | <b>1165.5</b>  | 1170.2 | 1170.1 | 1177.4   |

WAIC, widely applicable Akaike information criterion; HC, healthy control; OCD, obsessive-compulsive disorder; PG, pathological gambling; Best-fitted RL, RL2 in reward trials and RL3 in avoidance trials; VKF, Volatility Kalman Filter model; PH, Pearce-Hall model; and RELATIVE, RELATIVE model.
