# Supplementary material for: Individuals with problem gambling and obsessive-compulsive disorder learn through distinct reinforcement mechanisms
Source: PubMed Central journal article supplement (PMC10013903; doi:10.1371/journal.pbio.3002031), 2023-03-14
Supplement: pbio.3002031.s018.pdf [file pbio.3002031.s018.pdf]

**S7 Table. WAIC values in the supplementary model comparison.**

| Group | Best-fitted RL | RL1 <sub>common</sub> | RL2 <sub>common</sub> | RL3 <sub>common</sub> | RL <sub>motor-perseveration</sub> |
|-------|----------------|-----------------------|-----------------------|-----------------------|-----------------------------------|
| HC    | <b>4178.4</b>  | 4396.9                | 4275.5                | 4277.6                | 4369.3                            |
| OCD   | <b>3387.4</b>  | 3642.0                | 3496.2                | 3509.0                | 3656.0                            |
| PG    | <b>2160.1</b>  | 2250.5                | 2190.1                | 2171.5                | 2226.2                            |

WAIC, widely applicable Akaike information criterion; HC, healthy control; OCD, obsessive-compulsive disorder; PG, pathological gambling; Best-fitted RL, RL2 in reward trials and RL3 in avoidance trials; RL1<sub>common</sub>, RL1 that has a common set of parameters across the reward and the avoidance trials; RL2<sub>common</sub>, RL2 that has a common set of parameters across the reward and the avoidance trials; RL3<sub>common</sub>, RL3 that has a common set of parameters across the reward and the avoidance trials. RL<sub>motor-perseveration</sub>, RL with motor-perseveration.
